# Supplementary material for: The Evolution of Vp1 Gene in Enterovirus C Species Sub-Group That Contains Types CVA-21, CVA-24, EV-C95, EV-C96 and EV-C99
Source: PubMed Central journal article supplement (PMC3973639; doi:10.1371/journal.pone.0093737), 2014-04-02

# CVA-21 vs. EV-C96

A

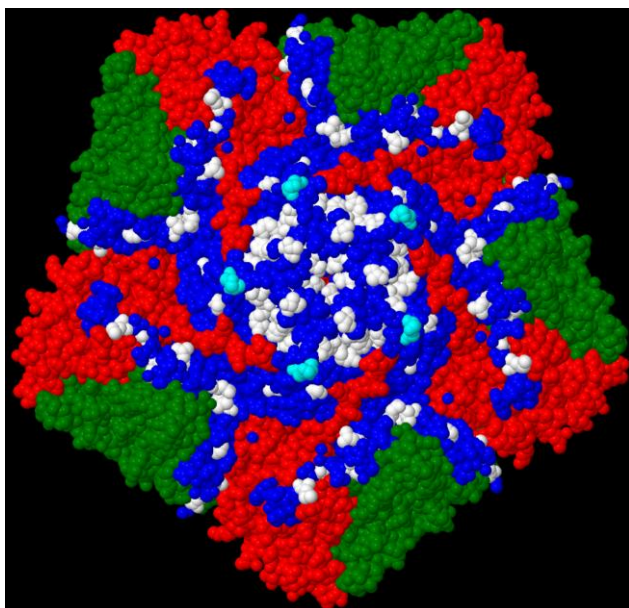

B

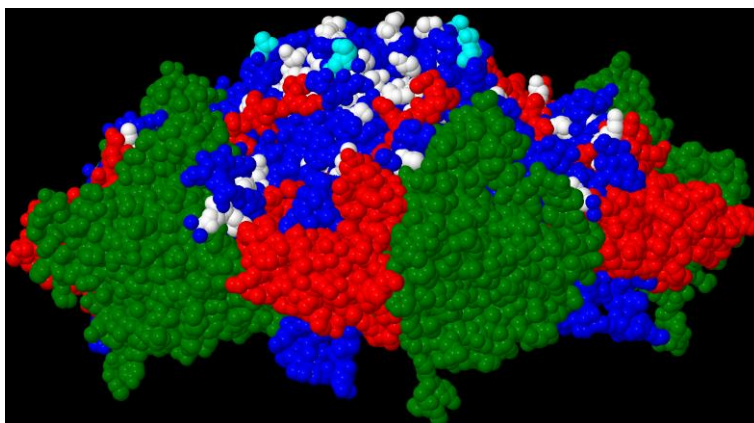

C

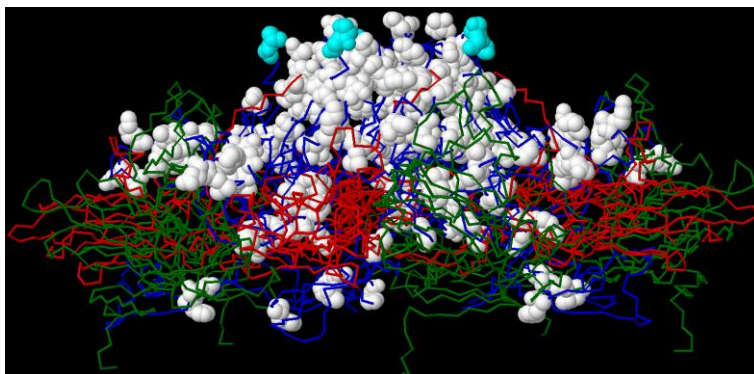

# CVA-21 vs. EV-C99

D

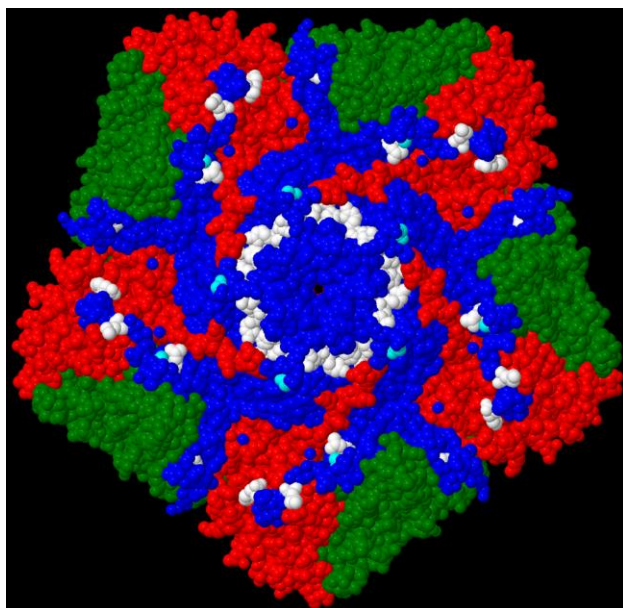

E

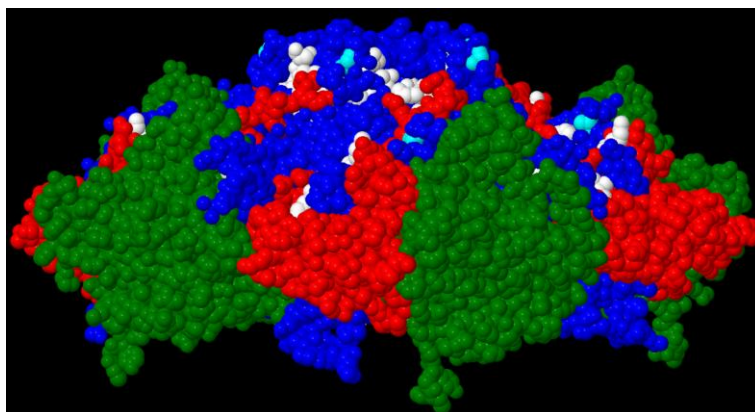

F

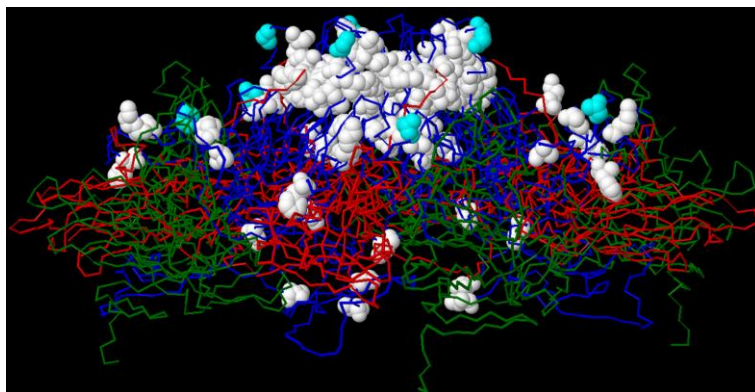

# CVA-21 vs.CVA-24

G

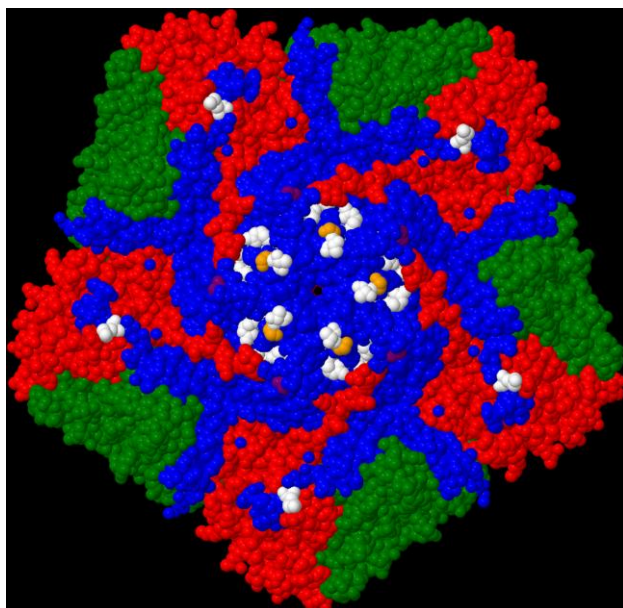

H

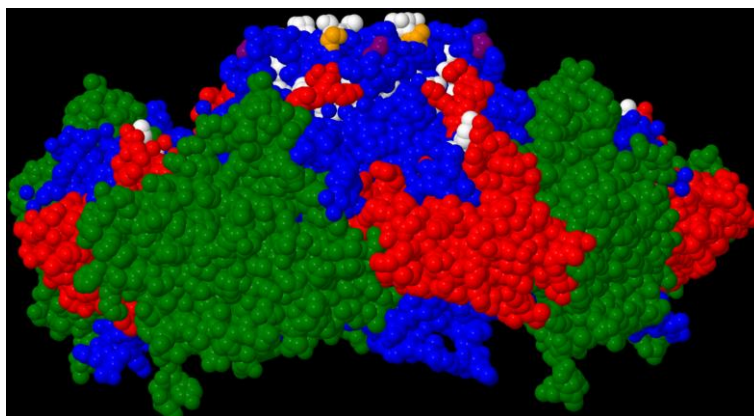

I

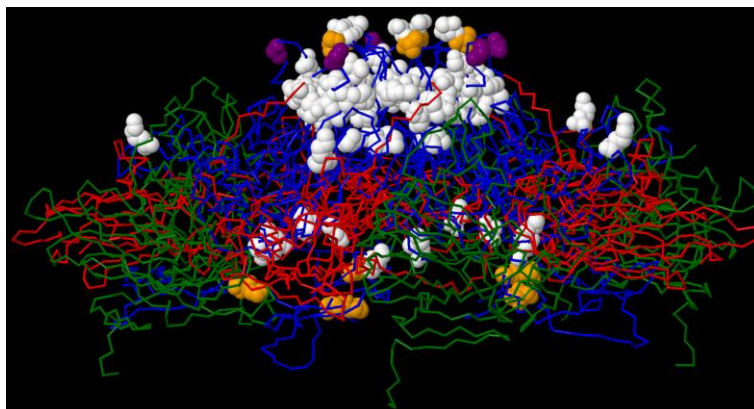

Supplement: pone.0093737.s001.pdf [file pone.0093737.s001.pdf]
